# Supplementary material for: Changes in insulin receptor signaling underlie neoadjuvant metformin administration in breast cancer: a prospective window of opportunity neoadjuvant study
Source: PubMed Central journal article supplement (PMC4381495; doi:10.1186/s13058-015-0540-0), 2015-03-03
Supplement: 13058_2015_540_MOESM2_ESM.pdf [file 13058_2015_540_MOESM2_ESM.pdf]

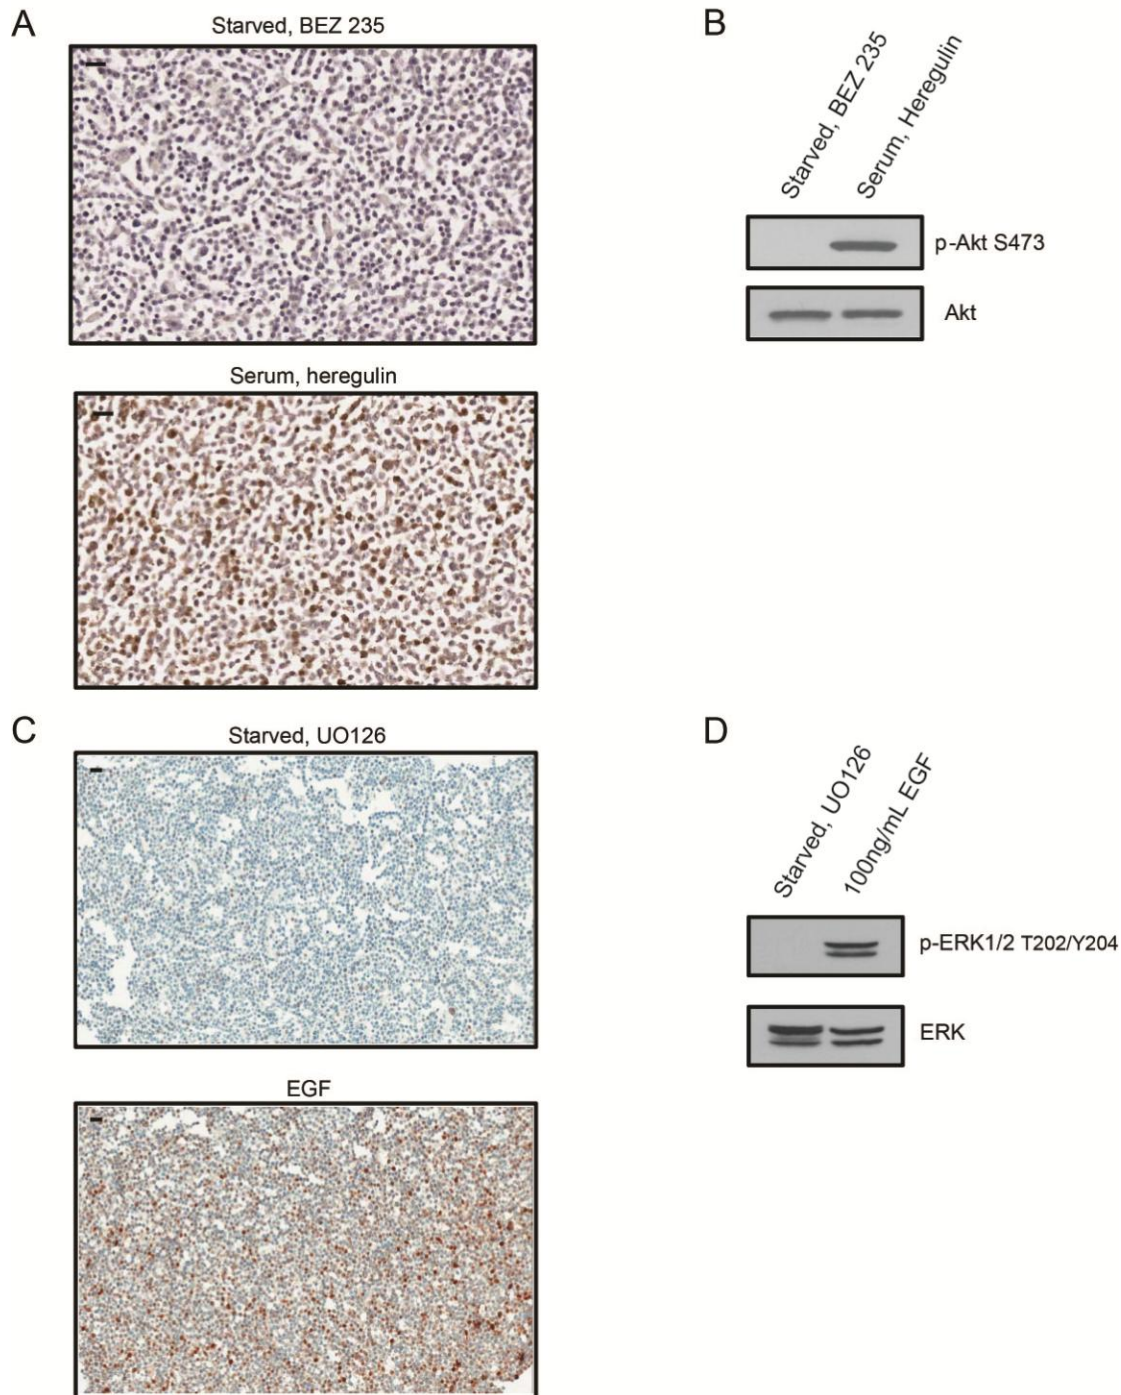

**Additional File 2: Optimization of antibodies against p-Akt (S473) and p-ERK1/2 (T202/Y204) for immunohistochemistry.** The antibodies for p-Akt (S473) and p-ERK1/2 (T202/Y204) were optimized for IHC using MCF-7 cells. For p-Akt antibody optimization, cells were starved and treated with 200nM BEZ235 for 1 hour or stimulated with serum and 100ng/ml heregulin for 20 minutes. For the p-ERK1/2 antibody, cells were starved of serum overnight and then treated with either 10uM of the MEK1/2 inhibitor UO126 for 1 hour or with media containing 100ng/ml EGF for 10 minutes. p-Akt (S473) and p-ERK1/2(T202/Y204) signal was detected by IHC staining (**A** and **C**) and confirmed by Western blotting (**B** and **D**). Scale bar 30 um (A and C).
