# Supplementary material for: Changes in insulin receptor signaling underlie neoadjuvant metformin administration in breast cancer: a prospective window of opportunity neoadjuvant study
Source: PubMed Central journal article supplement (PMC4381495; doi:10.1186/s13058-015-0540-0), 2015-03-03
Supplement: 13058_2015_540_MOESM5_ESM.pdf [file 13058_2015_540_MOESM5_ESM.pdf]

### Additional file 5: Tumour characteristics

| Characteristic | n (%)      |
|----------------|------------|
| Tumour Grade   |            |
| Grade I        | 3 (7.7%)   |
| Grade II       | 20 (51.3%) |
| Grade III      | 16 (41%)   |
| Tumour stage   |            |
| T1             | 20 (51.3%) |
| T2             | 16 (41%)   |
| T3             | 3 (7.7%)   |
| Nodal Status   |            |
| Negative       | 24 (61.5%) |
| Positive       | 15 (38.5%) |
| ER             |            |
| Positive       | 33 (84.6%) |
| Negative       | 6 (15.4%)  |
| PgR            |            |
| Positive       | 32 (82.1%) |
| Negative       | 7 (17.9%)  |
| HER2           |            |
| Positive       | 5 (12.8%)  |
| Negative       | 34 (87.2%) |
