# Supplementary material for: Changes in insulin receptor signaling underlie neoadjuvant metformin administration in breast cancer: a prospective window of opportunity neoadjuvant study
Source: PubMed Central journal article supplement (PMC4381495; doi:10.1186/s13058-015-0540-0), 2015-03-03
Supplement: 13058_2015_540_MOESM6_ESM.pdf [file 13058_2015_540_MOESM6_ESM.pdf]

**A**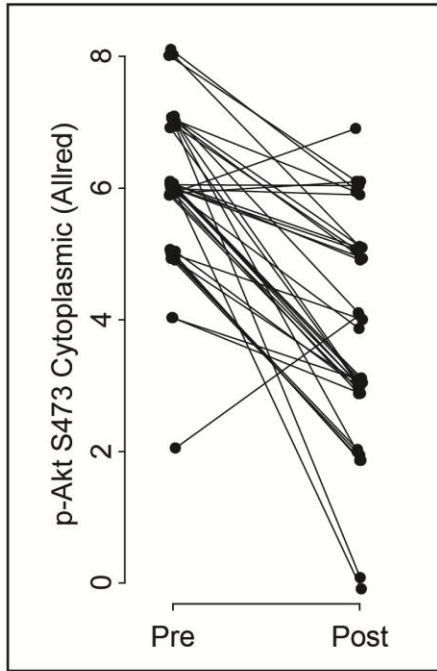**B**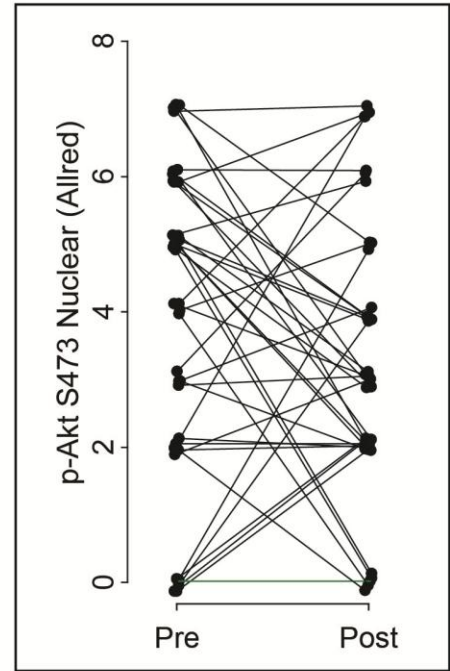

**Additional File 6: Cytoplasmic and nuclear Allred scores for p-Akt S473.** Allred scores for cytoplasmic (**A**) and nuclear (**B**) p-Akt S473 as measured pre- and post-metformin treatment.
