# Supplementary material for: Changes in insulin receptor signaling underlie neoadjuvant metformin administration in breast cancer: a prospective window of opportunity neoadjuvant study
Source: Springer Nature journal article supplement (doi:10.1186/s13058-015-0540-0), 2015-03-02
Supplement: MOESM4 [file 9781376]

A

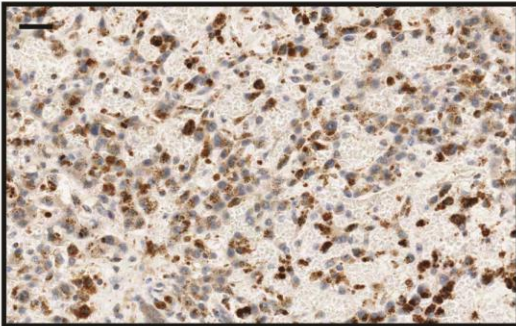

Normal liver tissue

B

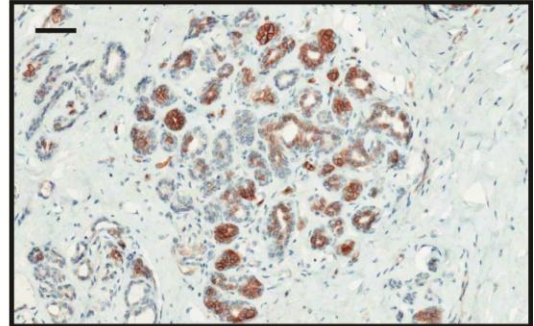

Normal breast tissue

C

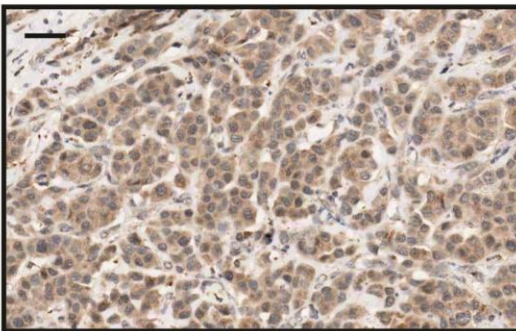

Breast tumour

**Additional File 4: Optimization of the antibody against OCT1 for immunohistochemistry.** The antibody for OCT1 was optimized using formalin fixed-paraffin embedded tissue from normal human liver (A) and breast (B), as well as tissue from breast tumours (C). Scale bar 30 um (A and B), 60 um (C).
